# Supplementary material for: Dendron-grafted sulfur-terminated phenyleneethynylene molecular rods and blue luminescence self-assembly with Au nanoparticles
Source: Royal Society of Chemistry journal article supplement (doi:10.1039/b404010d), 2004-01-01
Supplement: b404010d.pdf [file b404010d.pdf]

## Electronic supplementary information

### Dendron-grafted sulfur-terminated phenyleneethynylene molecular rods and blue-luminescence self-assembly with Au nanoparticles

Tomokazu Tozawa<sup>ab</sup>

<sup>a</sup>Hiroshima Joint Center for Nanotechnology Particle Project, Japan Chemical Innovation Institute, Advanced Science of Matter, Hiroshima University, 1-3-1 Kagamiyama, Higashihiroshima, Hiroshima, 739-8530, Japan. Fax: (+81)824-24 5529; Tel: (+81)824-24 5529; E-mail: tozawa@nanoparticle.jp

<sup>b</sup>Mitsubishi Chemical Corporation, Yokohama Research Center, 1000 Kamoshida-cho, Aoba-ku, Yokohama 227-8502, Japan.

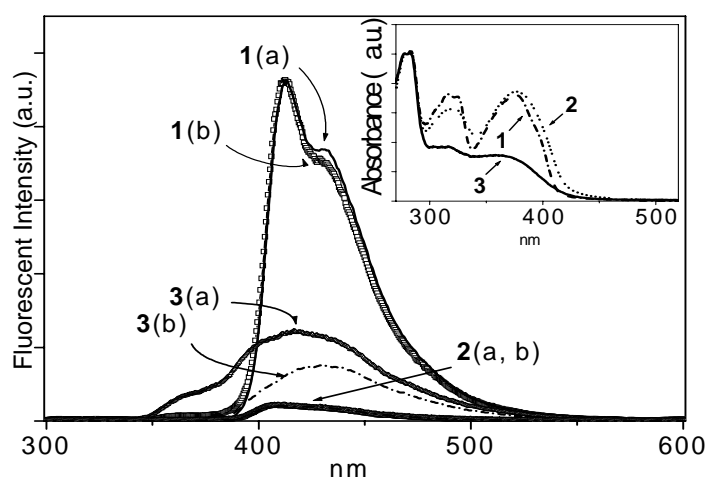

**Fig.S1** Emission spectra of **1**, **2** and **3** in degassed THF at 298K (a:  $\lambda_{\text{exc}} = 280$  nm), b: ( $\lambda_{\text{exc}} = 380$  nm). Inset: Normalized (at 280nm) absorption spectra of **1**, **2** and **3** in degassed THF at room temperature

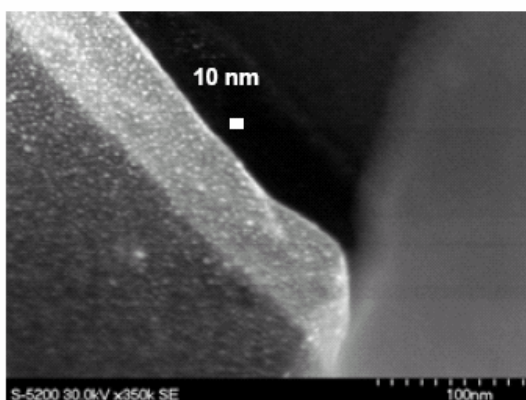

**Fig. S2a**

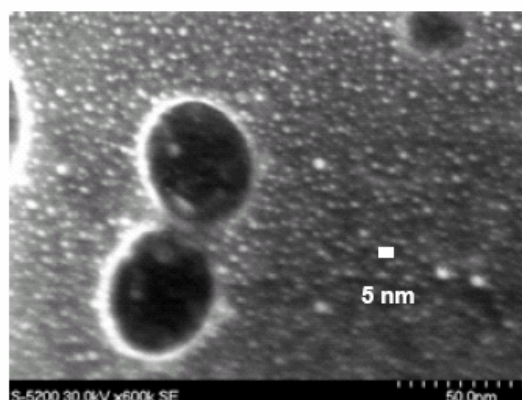

**Fig. S2b**

**Fig. S2a, 2b** Selected SEM images of 3-Au nanoparticle composite.

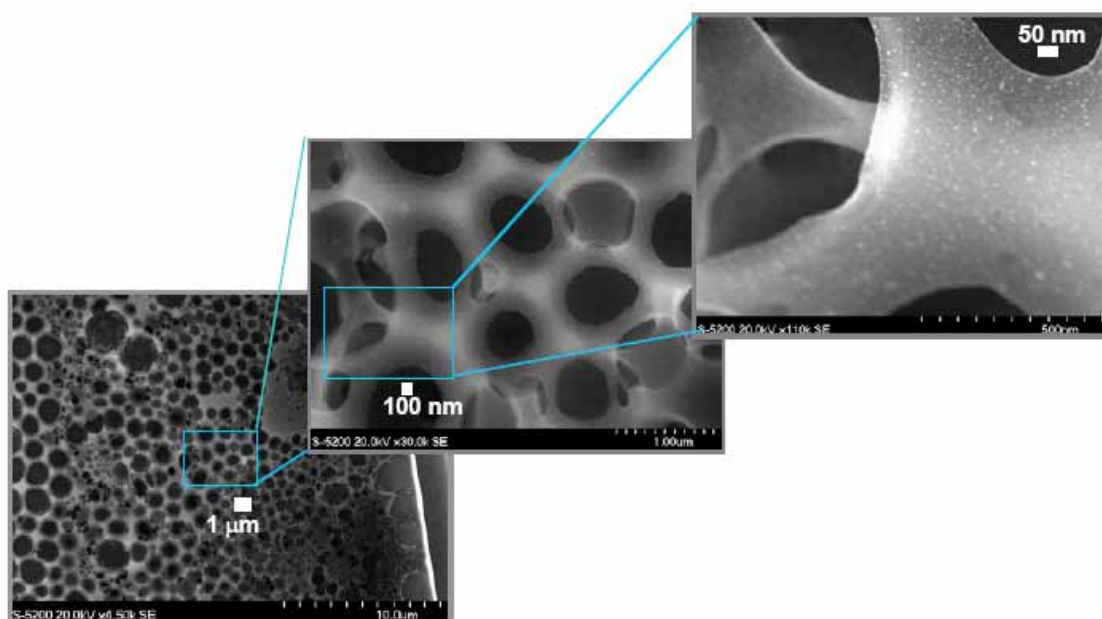

**Fig. S3** SEM images of 3-Au nanoparticle composite at three different magnifications in the same region as related to **Fig 1a**

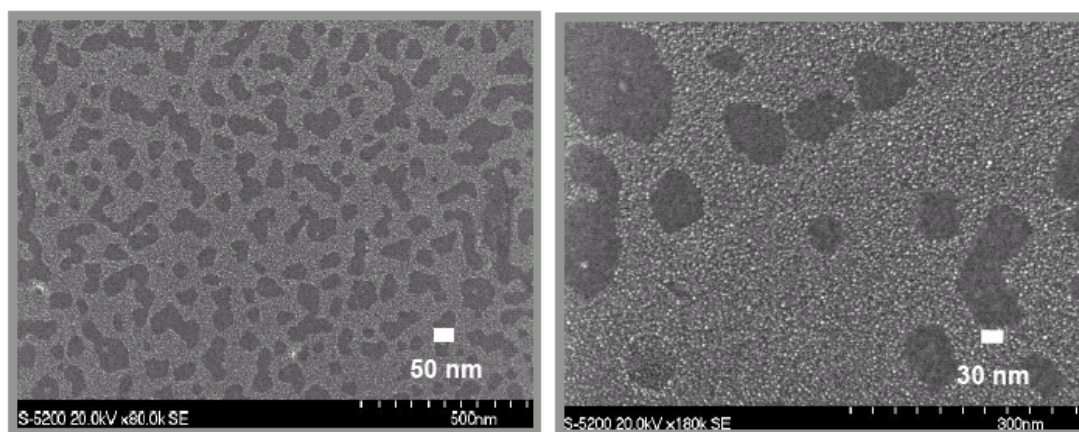

**Fig. S4** SEM images of 1-Au nanoparticle mixture.
